# Supplementary material
Source: PubMed Central journal article supplement (PMC5989729)
Supplement: NIHMS969509-supplement-supplement3.pdf [file NIHMS969509-supplement-supplement3.pdf]

## Locations of Surface Fish sampled:

Rio Sabinos and Rio Sarco (n=12)

San Rafael Los Castros (n=9)

Rio Florido (n=1)

Chamal (n=1)

Nacimiento del Rio Santa Clara (n=21)

Rio Subterraneo Valley (n=27)
