# Supplementary material
Source: PubMed Central journal article supplement (PMC5989729)

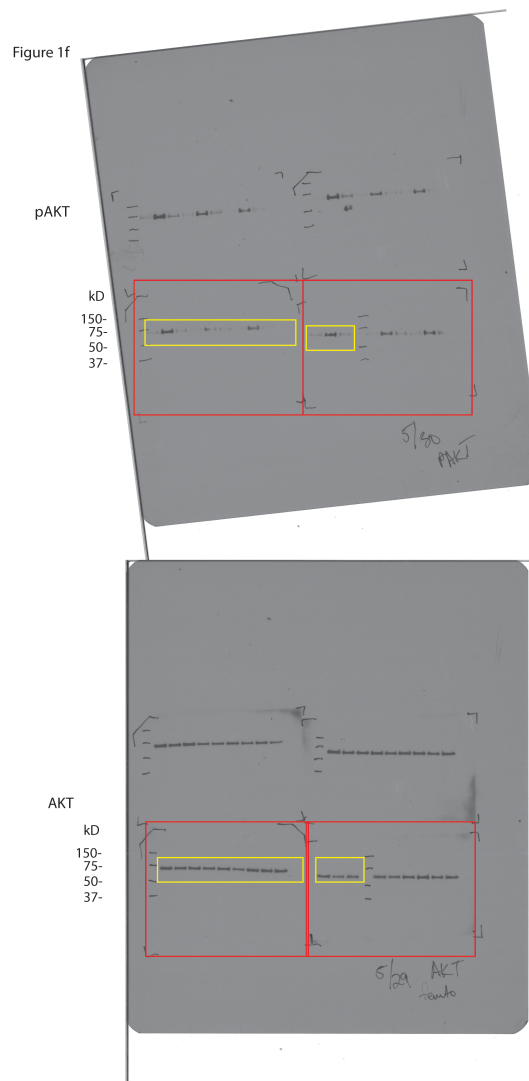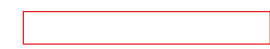

Supplement: NIHMS969509-supplement-supplement2.pdf [file NIHMS969509-supplement-supplement2.pdf]
